# Supplementary material
Source: Springer Nature journal article supplement (https://www.springermedizin.de/resource/supplementary/13690_2010_15_MOESM1_ESM.pdf/9422414)
Supplement: MOESM1 [file 9422414]

2812 questionnaires sent

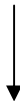

*Participation rate: 18.3%*

514 questionnaires sent back

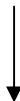

*13 questionnaires excluded*

501 questionnaires eligible

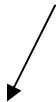

82 questionnaires filled in  
with the help of third party

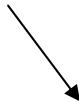

**419 questionnaires filled  
in without help**

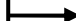

**Persons taken into  
account in our analyses**  
⇨ **‘The participants’**
